# Supplementary material
Source: PubMed Central journal article supplement (PMC6265654)
Supplement: blood818948-suppl1.pdf [file blood818948-suppl1.pdf]

## **SUPPLEMENTAL MATERIALS**

### **Supplemental Methods**

### **Supplemental Tables**

**Table S1. Listing of identified patient 11q23 rearrangements and genetic co-variants.**

**Table S2. Treatment-emergent adverse events that occurred in 5 or more patients.**

### **Supplemental Figures**

**Figure S1. Decreased levels of H3K79me2 and transcription at MLL-r target gene loci.**

**Figure S2. Histological resolution of leukemia cutis.**

**Figure S3. Pinometostat-induced differentiation of leukemic blasts in *MLL-r* patients.**

### **References**

## Supplemental Methods

**Next-Generation Sequencing (NGS) utilizing the MyAML panel.** Confirmation of individual patient's *MLL-r* and identification of genetic co-variants was performed at Invivoscribe (San Diego, CA). Briefly, 5 µg of high quality DNA was isolated from mononuclear cells collected from either peripheral blood or bone marrow aspirate and sequenced using an NGS panel designed to capture both the coding and non-coding regions of 194 AML specific genes. Sequencing was performed with 300 bp paired end reads on the Illumina MiSeq platform with an average coverage of 1,000X. Utilizing a custom bioinformatics pipeline that aligned reads to the human genome assembly 19 (hg19) reference genome, genetic alterations including single nucleotide variants, indels, inversions, translocations, and copy number variants were identified.

**Chromatin immunoprecipitation sequencing (ChIP-seq).** Leukemic blasts from patients in the 90 mg/m<sup>2</sup>/day 28-day CIV cohort were analyzed for H3K79me2 levels at specific *MLL* target loci and non-*MLL* target gene sites<sup>1</sup>. Briefly, hematopoietic cells were FACS-isolated from patient peripheral blood samples before treatment and various days during the pinometostat infusion cycles, as indicated. Crosslinking was performed for 5 minutes in phosphate buffered saline with 1% formaldehyde and stopped by addition of glycine to 0.125M and Tris to 0.1M. After cytoplasm lysis, the nuclei were re-suspended in buffer containing 1% SDS in the presence of protease inhibitors. Chromatin was sheared using an E220 Covaris sonicator. Immunoprecipitation of chromatin fragments was performed using a rabbit monoclonal antibody specific for H3K79me2 (#5427, Cell Signaling Technology; Danvers, MA) immobilized on protein-A magnetic Dynabeads (Thermo Fisher; Waltham, MA). Eluted DNA-protein complexes were reverse cross-linked in 0.1M NaHCO<sub>3</sub>, 0.2M NaCl, 1% SDS, pH8.0 and purified with the Agencourt AMPure XP magnetic beads (Beckman Coulter; Brea, CA). Isolated DNA fragments were barcoded with the NEBNext DNA Library Preparation Kit (New England Biolabs; Ipswich, MA) according to the manufacturer's protocol and sequenced on an Illumina HiSeq 2000 platform.

**Real-Time quantitative reverse transcription PCR (qRT-PCR).** Expression levels for the *MLL-r* target gene *HOXA9* in patient PBMCs were determined by qRT-PCR analysis performed

by EA Genomics of Q<sup>2</sup> Solutions (Morrisville, NC). *HOXA9* expression was normalized to *MLL* fusion transcript levels, which are unaltered over the course of pinometostat treatment (data not shown). The sequences flanking the specific *MLL* rearrangement in samples were determined by RNA-seq analysis and used to design custom *MLL* TaqMan Assays for each patient. When possible, primers spanning the *MLL* fusion boundary were identified, and used with 5'VIC-labeled probes that overlapped the *MLL* breakpoint to minimize detection of off-target product.

Total RNA was isolated from peripheral blood samples collected at the start of study and at multiple time points over the course of pinometostat treatment. Samples were reverse transcribed using 0.25 - 0.5µg RNA with the High Capacity cDNA Reverse Transcription Kit (Thermo Fisher). Templates were amplified in triplicate in 20µL final reaction volumes containing 1x TaqMan Universal PCR Master Mix, 3µL of 1:4 cDNA, and 1x *HOXA9* (Hs00365956\_m1) - FAM TaqMan Assay primer and probe set using the manufacturer's recommended conditions. *RTFI* (Hs00385532\_m1 - FAM) was used as an internal control assay. *MLL*-fusion assays with VIC-labeled probes were multiplexed with the *HOXA9* FAM-TaqMan Assays. Each processing batch included no template controls (NTC) and no reverse transcriptase enzyme controls (NEC). Reactions were run for 45 cycles on an Applied Biosystems Fast 7500 PCR machine using standard TaqMan cycling parameters. NECs and NTCs passed quality control metrics of CT>40 and the internal control assays were readily detected and had CTs within the QC range of 5-30.

## Supplemental Tables

Table S1. Listing of identified patient 11q23 rearrangements and genetic co-variants

| Patient ID | Disease | Tissue | Days on Study | Local 11q23 rearrangement (cytogenetics) | Central 11q23 rearrangement and fusion partner (NGS) | co-Variants                                                                                                        |
|------------|---------|--------|---------------|------------------------------------------|------------------------------------------------------|--------------------------------------------------------------------------------------------------------------------|
| A2         | AML     | BMA    | 8             | (4;11)                                   | (4;11) AFF1                                          | IZKF1 (R83*); MTOR (T1881M); CSF1R (V32G); JAK2 (N1108); ASXL1 (R1316L)                                            |
| A4         | AML     | PBMC   | 49            | (6;11)                                   | (6;11) MLLT4                                         | NRAS (Q61K); PTPN11 (A72T); TET2 (H667Y, N1260S, G1606A); CSF1R (T507M); SRRM2 (R1689C)                            |
| A5         | AML     | BMA    | 65            | (11;19)                                  | (11;19) ELL                                          | SRMM2 (K807T, T2289A)                                                                                              |
| A6         | AML     | PBMC   | 196           | (11;19)                                  | (11;19) MLLT1                                        | TET2 (K244*, C1374W); SRSF2 (P95L); CBFβ (N104S)                                                                   |
| A7         | AML     | BMA    | 38            | +11                                      | MLL-PTD                                              | DNMT3A (N879D); IDH1 (R132C, Q138K); KRAS (G12C); JAK1 (1 bp deletion); HDAC2 (1 bp insertion)                     |
| A8         | AML     | BMA    | 136           | (11;19)                                  | (11;19) ELL                                          | NRAS (G12C); DIS3 (1 bp deletion)                                                                                  |
| A9         | AML     | BMA    | 31            | non-MLLr                                 | (6;11) MLLT4                                         | SETD2 (R1543W); WT1 (17 bp deletion)                                                                               |
| A10        | AML     | BMA    | 86            | dup(11)(q22.1;q25)                       | non-MLLr                                             | CEBPA (L331Q, N292S, Y181*); SRSF2 (P95H); ASXL1 (Y591*); STAG2 (W1103*); IDH1 (F32V); TET2 (A1153P); JAK2 (A800D) |
| A11        | AML     | PBMC   | 59            | t(5;11)(q13;q21)                         | non-MLLr                                             | KRAS (Q61L); PTPN11 (E76K); SF3B1 (H662Q)                                                                          |
| A12        | AML     | PBMC   | 38            | del(11)(q23q25)                          | (11;19) ELL                                          | TP53 (Y126S); NSD1 (R1233Q)                                                                                        |
| A13        | AML     | PBMC   | 71            | +11                                      | MLL-PTD                                              | DNMT3A (W89S); FLT3 D835V; IDH2 (R140Q)                                                                            |
| A14        | ALL     | PBMC   | 80            | (11;19)                                  | (11;19) MLLT1                                        | NRAS (G12D); ASXL1 (D799Y)                                                                                         |
| A15        | AML     | PBMC   | 13            | (6;11)                                   | (6;11) MLLT4                                         | CBX5 (E61*)                                                                                                        |
| A16        | AML     | PBMC   | 53            | No Result                                | (9;11) MLLT3                                         | FLT3 (D835H); WT1 (S381*)                                                                                          |
| A17        | AML     | PBMC   | 70            | (9;11)                                   | (9;11) MLLT3                                         | GATA2 (D209Tfs*9)                                                                                                  |
| A18        | AML     | PBMC   | 36            | (10;11)                                  | not sequenced                                        | No sequencing result (Low DNA yield)                                                                               |
| B1         | AML     | BMA    | 21            | (3;11)                                   | (3;11) TFG                                           | U2AF1 (Q157P); PTPRT (R401W)                                                                                       |
| B3         | AML     | PBMC   | 21            | (6;11)                                   | (6;11) MLLT4                                         | NOTCH1 (T1379P); BCR (T1018A)                                                                                      |
| B4         | ALL     | PBMC   | 82            | (6;11)                                   | (6;11) MLLT4                                         | TET1 (K22fs*23); DIS3 (*959Q, stop loss); U2AF2 (1bp deletion)                                                     |
| B6         | AML     | PBMC   | 29            | (9;11)                                   | (9;11) MLLT3                                         | FLT3 (Q580_E598dup); KIT (D816V);                                                                                  |
| B7         | AML     | PBMC   | 18            | (10;11)                                  | (10;11) MLLT10                                       | TP53 (A138Pfs*7)                                                                                                   |
| B8         | ALL     | PBMC   | 19            | (4;11)                                   | (4;11) AFF1                                          | No variants detected                                                                                               |
| B9         | AML     | PBMC   | 21            | (6;11)                                   | (6;11) MLLT4                                         | CBL (R718*); NRAS (Q61K); CEBPA (R323P); SUZ12 (M1?); WT1 (R471Pfs*30)                                             |
| B10        | AML     | PBMC   | 17            | (11;19)                                  | (11;19) ELL                                          | KRAS (G12D)                                                                                                        |
| C3         | AML     | PBMC   | 33            | (6;11)                                   | (6;11) MLLT4                                         | FLT3 (ITD 193 bp, ITD 39 bp, ITD 84 bp, ITD 36 bp)                                                                 |
| C4         | AML     | PBMC   | 49            | (1;11), (11;19)                          | (11;19) MLLT1                                        | ASXL1 (S846N)                                                                                                      |
| D2         | AML     | BMA    | 110           | (11;19)                                  | (11;19) ELL                                          | GATA1 (L194P)                                                                                                      |
| D3         | AML     | BMA    | 50            | add 11q23                                | (10;11) MLLT10                                       | SETD2 (R1625H); TET2 (P1655L); FANCC (1 bp deletion)                                                               |
| D4         | AML     | PBMC   | 44            | (11;19)                                  | (11;19) ELL                                          | NRAS (Q61K)                                                                                                        |

| Patient ID | Disease | Tissue | Days on Study | Local 11q23 rearrangement (cytogenetics) | Central 11q23 rearrangement and fusion partner (NGS) | co-Variants                                                                                                                                                             |
|------------|---------|--------|---------------|------------------------------------------|------------------------------------------------------|-------------------------------------------------------------------------------------------------------------------------------------------------------------------------|
| D5         | AML     | PBMC   | 80            | (11;1;10)                                | (10;11) MLLT10                                       | U2AF1 (S34F)                                                                                                                                                            |
| D6         | AML     | PBMC   | 13            | (11;19)                                  | (11;19) ELL                                          | JAK2 (N1108S); KRAS (G12D); NRAS (G13D); PRDM16 (Y68*); RPS6KA6 (G157*)                                                                                                 |
| D7         | AML     | PBMC   | 3             | (9;11;16)(p22;q23;q22)                   | non-MLLr                                             | WT1 (S381*); SF1 (P609_P610del); ZRSR2 (R433_S434insSRGRGSR)                                                                                                            |
| D8         | AML     | PBMC   | 109           | (11;19)                                  | (11;19) ELL                                          | WT1 (A382Gfs*69); KIT (V399I); PRDM16 (S497Afs*42); PTEN (C304*)                                                                                                        |
| F2         | AML     | PBMC   | 41            | non-MLLr                                 | MLL-PTD                                              | FLT3 (D835V, 33 bp ITD); DNMT3A (R882H); KRAS (Q61R); U2AF1 (S34F); IDH1 (H40N); MECOM (G614fs*30); NOTCH1 (T2511P); WAPAL (splice donor variant); BCOR (1 bp deletion) |
| F3         | ALL     | BMA    | 15            | (4;11)                                   | (4;11) AFF1                                          | FLT3 (N626S); TP53 (V197M); ASXL2 (S114N); TET2 (K1911I); CBL (in frame 3 bp deletion YD455-456Y); CTCF (2 bp deletion)                                                 |
| F4         | AML     | PBMC   | 28            | No Result                                | MLL-PTD                                              | FLT3 (57 bp ITD); DNMT3A (V636M); U2AF1 (S34F); ASXL3 (Q2111E)                                                                                                          |
| F5         | AML     | PBMC   | 10            | (10;11)                                  | not sequenced                                        | No sequencing result (Low DNA yield)                                                                                                                                    |
| F6         | AML     | PBMC   | 50            | non-MLLr                                 | MLL-PTD                                              | BCOR (V379Afs*62); DNMT3A (R882H); NF1 (R1276*); NRAS (Q61H); NRAS (G12D); PTPN11 (E76G); U2AF1 n(S34F); KMT2C (M305Dfs*28)                                             |
| F7         | MLL     | PBMC   | 43            | non-MLLr                                 | non-MLLr                                             | IDH2 (R140Q); RUNX1 (N448Rfs*147); SRSF2 (p95H)                                                                                                                         |
| G1         | AML     | NA     | 20            | MLL-r                                    | not sequenced                                        | Sample unavailable                                                                                                                                                      |
| G2         | ALL     | NA     | 12            | MLL-r                                    | not sequenced                                        | Sample unavailable                                                                                                                                                      |

NA = not available

**Table S2. Treatment-emergent AEs that occurred in 5 or more patients**

| Primary System Organ Class<br>Preferred Term, n (%)         | Dose Escalation                                  |                                                  |                                                  |                                                  |                                                  |                                                  | Expansion                                        |                                                   | Total<br>(N=51) |
|-------------------------------------------------------------|--------------------------------------------------|--------------------------------------------------|--------------------------------------------------|--------------------------------------------------|--------------------------------------------------|--------------------------------------------------|--------------------------------------------------|---------------------------------------------------|-----------------|
|                                                             | 12 mg/m <sup>2</sup> /day<br>21-day CIV<br>(N=1) | 24 mg/m <sup>2</sup> /day<br>21-day CIV<br>(N=5) | 36 mg/m <sup>2</sup> /day<br>21-day CIV<br>(N=4) | 54 mg/m <sup>2</sup> /day<br>21-day CIV<br>(N=6) | 80 mg/m <sup>2</sup> /day<br>21-day CIV<br>(N=3) | 90 mg/m <sup>2</sup> /day<br>28-day CIV<br>(N=7) | 54 mg/m <sup>2</sup> /day<br>28-day CIV<br>(N=8) | 90 mg/m <sup>2</sup> /day<br>28-day CIV<br>(N=17) |                 |
| <b>Patients with at least 1 TEAE, n (%)</b>                 | <b>1 (100)</b>                                   | <b>5 (100)</b>                                   | <b>4 (100)</b>                                   | <b>6 (100)</b>                                   | <b>3 (100)</b>                                   | <b>7 (100)</b>                                   | <b>8 (100)</b>                                   | <b>17 (100)</b>                                   | <b>51 (100)</b> |
| <b>Metabolism and nutrition disorders</b>                   | <b>0</b>                                         | <b>4 (80)</b>                                    | <b>3 (75)</b>                                    | <b>4 (67)</b>                                    | <b>3 (100)</b>                                   | <b>6 (86)</b>                                    | <b>4 (50)</b>                                    | <b>14 (82)</b>                                    | <b>38 (75)</b>  |
| Hypokalaemia                                                | 0                                                | 0                                                | 1 (25)                                           | 1 (17)                                           | 1 (33)                                           | 4 (57)                                           | 4 (50)                                           | 5 (29)                                            | 16 (31)         |
| Hypocalcaemia                                               | 0                                                | 0                                                | 1 (25)                                           | 2 (33)                                           | 0                                                | 3 (43)                                           | 0                                                | 9 (53)                                            | 15 (29)         |
| Hypomagnesaemia                                             | 0                                                | 1 (20)                                           | 1 (25)                                           | 1 (17)                                           | 2 (67)                                           | 2 (29)                                           | 2 (25)                                           | 3 (18)                                            | 12 (24)         |
| Hyperuricaemia                                              | 0                                                | 2 (40)                                           | 1 (25)                                           | 0                                                | 0                                                | 0                                                | 0                                                | 3 (18)                                            | 6 (12)          |
| Hypophosphataemia                                           | 0                                                | 0                                                | 0                                                | 1 (17)                                           | 0                                                | 0                                                | 2 (25)                                           | 3 (18)                                            | 6 (12)          |
| Decreased appetite                                          | 0                                                | 1 (20)                                           | 1 (25)                                           | 1 (17)                                           | 0                                                | 1 (14)                                           | 0                                                | 1 (6)                                             | 5 (10)          |
| <b>Gastrointestinal disorders</b>                           | <b>0</b>                                         | <b>2 (40)</b>                                    | <b>2 (50)</b>                                    | <b>3 (50)</b>                                    | <b>1 (33)</b>                                    | <b>5 (71)</b>                                    | <b>8 (100)</b>                                   | <b>16 (94)</b>                                    | <b>37 (73)</b>  |
| Nausea                                                      | 0                                                | 1 (20)                                           | 2 (50)                                           | 2 (33)                                           | 1 (33)                                           | 2 (29)                                           | 4 (50)                                           | 8 (47)                                            | 20 (39)         |
| Constipation                                                | 0                                                | 0                                                | 0                                                | 2 (33)                                           | 0                                                | 3 (43)                                           | 4 (50)                                           | 9 (53)                                            | 18 (35)         |
| Vomiting                                                    | 0                                                | 0                                                | 0                                                | 0                                                | 0                                                | 2 (29)                                           | 2 (25)                                           | 9 (53)                                            | 13 (25)         |
| Diarrhoea                                                   | 0                                                | 0                                                | 2 (50)                                           | 1 (17)                                           | 1 (33)                                           | 1 (14)                                           | 4 (50)                                           | 2 (12)                                            | 11 (22)         |
| Abdominal pain                                              | 0                                                | 0                                                | 0                                                | 0                                                | 0                                                | 2 (29)                                           | 3 (38)                                           | 5 (29)                                            | 10 (20)         |
| <b>General disorders and administration site conditions</b> | <b>0</b>                                         | <b>2 (40)</b>                                    | <b>3 (75)</b>                                    | <b>6 (100)</b>                                   | <b>1 (33)</b>                                    | <b>7 (100)</b>                                   | <b>5 (63)</b>                                    | <b>12 (71)</b>                                    | <b>36 (71)</b>  |
| Fatigue                                                     | 0                                                | 1 (20)                                           | 1 (25)                                           | 2 (33)                                           | 1 (33)                                           | 3 (43)                                           | 5 (63)                                           | 7 (41)                                            | 20 (39)         |
| Oedema peripheral                                           | 0                                                | 1 (20)                                           | 0                                                | 1 (17)                                           | 0                                                | 5 (71)                                           | 1 (13)                                           | 5 (29)                                            | 13 (25)         |
| Pyrexia                                                     | 0                                                | 1 (20)                                           | 0                                                | 2 (33)                                           | 1 (33)                                           | 4 (57)                                           | 0                                                | 2 (12)                                            | 10 (20)         |
| Mucosal inflammation                                        | 0                                                | 1 (20)                                           | 1 (25)                                           | 1 (17)                                           | 1 (33)                                           | 3 (43)                                           | 0                                                | 2 (12)                                            | 9 (18)          |
| Chills                                                      | 0                                                | 0                                                | 0                                                | 0                                                | 0                                                | 1 (14)                                           | 0                                                | 5 (29)                                            | 6 (12)          |
| Malaise                                                     | 0                                                | 0                                                | 0                                                | 0                                                | 0                                                | 1 (14)                                           | 1 (13)                                           | 4 (24)                                            | 6 (12)          |
| <b>Blood and lymphatic system disorders</b>                 | <b>1 (100)</b>                                   | <b>0</b>                                         | <b>3 (75)</b>                                    | <b>4 (67)</b>                                    | <b>1 (33)</b>                                    | <b>4 (57)</b>                                    | <b>7 (88)</b>                                    | <b>11 (65)</b>                                    | <b>31 (61)</b>  |
| Febrile neutropenia                                         | 0                                                | 0                                                | 1 (25)                                           | 1 (17)                                           | 0                                                | 3 (43)                                           | 5 (63)                                           | 8 (47)                                            | 18 (35)         |
| Leukocytosis                                                | 0                                                | 0                                                | 1 (25)                                           | 1 (17)                                           | 1 (33)                                           | 0                                                | 3 (38)                                           | 5 (29)                                            | 11 (22)         |
| Anaemia                                                     | 1 (100)                                          | 0                                                | 0                                                | 3 (50)                                           | 0                                                | 1 (14)                                           | 3 (38)                                           | 2 (12)                                            | 10 (20)         |

*continued*

**Table S2. Treatment emergent AEs that occurred in 5 or more patients (continued)**

| Primary System Organ Class<br>Preferred Term, n (%)        | Dose Escalation                                  |                                                  |                                                  |                                                  |                                                  |                                                  | Expansion                                        |                                                   | Total<br>(N=51) |
|------------------------------------------------------------|--------------------------------------------------|--------------------------------------------------|--------------------------------------------------|--------------------------------------------------|--------------------------------------------------|--------------------------------------------------|--------------------------------------------------|---------------------------------------------------|-----------------|
|                                                            | 12 mg/m <sup>2</sup> /day<br>21-day CIV<br>(N=1) | 24 mg/m <sup>2</sup> /day<br>21-day CIV<br>(N=5) | 36 mg/m <sup>2</sup> /day<br>21-day CIV<br>(N=4) | 54 mg/m <sup>2</sup> /day<br>21-day CIV<br>(N=6) | 80 mg/m <sup>2</sup> /day<br>21-day CIV<br>(N=3) | 90 mg/m <sup>2</sup> /day<br>28-day CIV<br>(N=7) | 54 mg/m <sup>2</sup> /day<br>28-day CIV<br>(N=8) | 90 mg/m <sup>2</sup> /day<br>28-day CIV<br>(N=17) |                 |
| Thrombocytopenia                                           | 1 (100)                                          | 0                                                | 1 (25)                                           | 0                                                | 0                                                | 2 (29)                                           | 0                                                | 2 (12)                                            | 6 (12)          |
| <b>Respiratory, thoracic and<br/>mediastinal disorders</b> | <b>1 (100)</b>                                   | <b>2 (40)</b>                                    | <b>1 (25)</b>                                    | <b>5 (83)</b>                                    | <b>1 (33)</b>                                    | <b>4 (57)</b>                                    | <b>4 (50)</b>                                    | <b>13 (76)</b>                                    | <b>31 (61)</b>  |
| Cough                                                      | 1 (100)                                          | 0                                                | 0                                                | 2 (33)                                           | 0                                                | 3 (43)                                           | 2 (25)                                           | 3 (18)                                            | 11 (22)         |
| Dyspnoea                                                   | 0                                                | 0                                                | 0                                                | 1 (17)                                           | 1 (33)                                           | 1 (14)                                           | 1 (13)                                           | 7 (41)                                            | 11 (22)         |
| Respiratory failure                                        | 0                                                | 0                                                | 0                                                | 0                                                | 0                                                | 2 (29)                                           | 0                                                | 5 (29)                                            | 7 (14)          |
| Oropharyngeal pain                                         | 0                                                | 1 (20)                                           | 0                                                | 2 (33)                                           | 0                                                | 1 (14)                                           | 1 (13)                                           | 1 (6)                                             | 6 (12)          |
| Pleural effusion                                           | 0                                                | 1 (20)                                           | 0                                                | 0                                                | 0                                                | 2 (29)                                           | 1 (13)                                           | 1 (6)                                             | 5 (10)          |
| <b>Investigations</b>                                      | <b>1 (100)</b>                                   | <b>4 (80)</b>                                    | <b>2 (50)</b>                                    | <b>2 (33)</b>                                    | <b>0</b>                                         | <b>4 (57)</b>                                    | <b>3 (38)</b>                                    | <b>12 (71)</b>                                    | <b>28 (55)</b>  |
| Blood alkaline phosphatase<br>increased                    | 0                                                | 2 (40)                                           | 0                                                | 1 (17)                                           | 0                                                | 0                                                | 1 (13)                                           | 2 (12)                                            | 6 (12)          |
| Platelet count decreased                                   | 0                                                | 0                                                | 0                                                | 0                                                | 0                                                | 0                                                | 2 (25)                                           | 4 (24)                                            | 6 (12)          |
| Blood bilirubin increased                                  | 0                                                | 2 (40)                                           | 0                                                | 1 (17)                                           | 0                                                | 0                                                | 0                                                | 2 (12)                                            | 5 (10)          |
| Blood creatinine increased                                 | 0                                                | 2 (40)                                           | 0                                                | 0                                                | 0                                                | 1 (14)                                           | 0                                                | 2 (12)                                            | 5 (10)          |
| ECG QT prolonged                                           | 0                                                | 0                                                | 1 (25)                                           | 0                                                | 0                                                | 0                                                | 1 (13)                                           | 3 (18)                                            | 5 (10)          |
| International normalised<br>ratio increased                | 0                                                | 0                                                | 0                                                | 0                                                | 0                                                | 1 (14)                                           | 0                                                | 4 (24)                                            | 5 (10)          |
| WBC count increased                                        | 0                                                | 0                                                | 2 (50)                                           | 0                                                | 0                                                | 0                                                | 0                                                | 3 (18)                                            | 5 (10)          |
| <b>Nervous system disorders</b>                            | <b>0</b>                                         | <b>2 (40)</b>                                    | <b>3 (75)</b>                                    | <b>5 (83)</b>                                    | <b>2 (67)</b>                                    | <b>3 (43)</b>                                    | <b>1 (13)</b>                                    | <b>9 (53)</b>                                     | <b>25 (49)</b>  |
| Dizziness                                                  | 0                                                | 0                                                | 0                                                | 1 (17)                                           | 1 (33)                                           | 1 (14)                                           | 0                                                | 2 (12)                                            | 5 (10)          |
| Headache                                                   | 0                                                | 1 (20)                                           | 0                                                | 1 (17)                                           | 0                                                | 0                                                | 0                                                | 3 (18)                                            | 5 (10)          |
| <b>Infections and infestations</b>                         | <b>0</b>                                         | <b>1 (20)</b>                                    | <b>2 (50)</b>                                    | <b>4 (67)</b>                                    | <b>3 (100)</b>                                   | <b>3 (43)</b>                                    | <b>3 (38)</b>                                    | <b>7 (41)</b>                                     | <b>23 (45)</b>  |
| Pneumonia                                                  | 0                                                | 0                                                | 0                                                | 2 (33)                                           | 3 (100)                                          | 2 (29)                                           | 0                                                | 2 (12)                                            | 9 (18)          |
| <b>Musculoskeletal and<br/>connective tissue disorders</b> | <b>0</b>                                         | <b>3 (60)</b>                                    | <b>3 (75)</b>                                    | <b>2 (33)</b>                                    | <b>1 (33)</b>                                    | <b>2 (29)</b>                                    | <b>3 (38)</b>                                    | <b>5 (29)</b>                                     | <b>19 (37)</b>  |
| Arthralgia                                                 | 0                                                | 1 (20)                                           | 2 (50)                                           | 1 (17)                                           | 1 (33)                                           | 0                                                | 0                                                | 1 (6)                                             | 6 (12)          |
| Pain in extremity                                          | 0                                                | 1 (20)                                           | 1 (25)                                           | 0                                                | 1 (33)                                           | 0                                                | 2 (25)                                           | 0                                                 | 5 (10)          |
| <b>Vascular disorders</b>                                  | <b>0</b>                                         | <b>1 (20)</b>                                    | <b>1 (25)</b>                                    | <b>0</b>                                         | <b>1 (33)</b>                                    | <b>2 (29)</b>                                    | <b>1 (13)</b>                                    | <b>5 (29)</b>                                     | <b>11 (22)</b>  |
| Hypotension                                                | 0                                                | 0                                                | 1 (25)                                           | 0                                                | 1 (33)                                           | 1 (14)                                           | 0                                                | 3 (18)                                            | 6 (12)          |

## Supplemental Figures

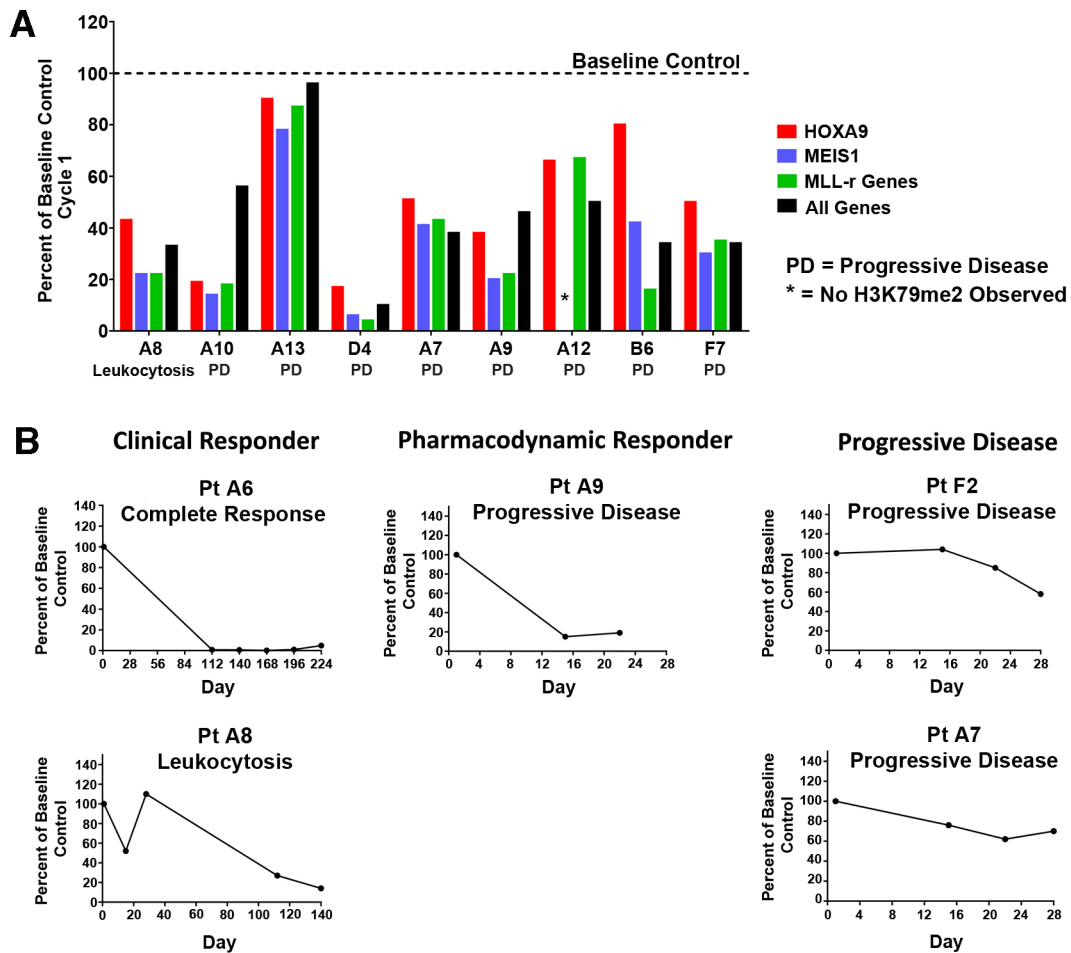

**Figure S1. Decreased levels of H3K79me2 and transcription at MLL-r target gene loci.** (A) H3K79me2 ChIP-seq was performed on leukemic blasts isolated from individual patients in the 90 mg/m<sup>2</sup>/day DEsc cohort with enough material to obtain 200,000 viable cells. Results from ChIP-seq analysis demonstrate that pinometostat inhibits H3K79 methylation both globally (black bars) and at MLL-r target genes (green bars). Further analysis of MLL-r target genes *HOXA9* (red bars) and *MEIS1* (blue bars) demonstrate that pinometostat also inhibits H3K79me2 specifically at loci implicated in MLL-r driven leukemogenesis. PD, progressive disease. (B) Real-time quantitative reverse transcriptase PCR analysis of *HOXA9* mRNA expression in frozen PBMC pellets collected from patients with different response profiles. Patients were selected based on the availability of material and sequence evidence describing the *MLL* breakpoint junction. *HOXA9* expression was normalized for changes in blast counts by utilizing each patient's unique *MLL* fusion breakpoint. Patients showing evidence of clinical responses tended to show reduced *HOXA9* levels relative to those with progressive disease.



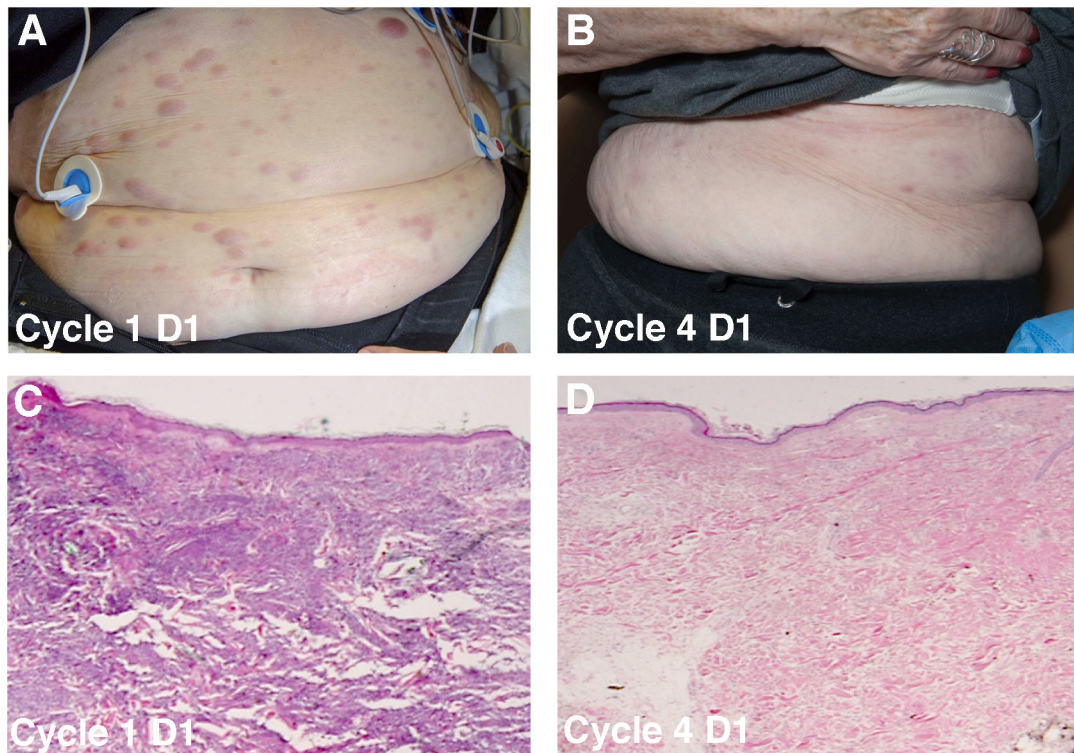

**Figure S2. Histological resolution of leukemia cutis.** (A) Abdominal lesions in CMML patient that resolved over the course of pinometostat treatment cycles (B). Histological characterization of abdominal lesion from the same patient at the start of treatment using hematoxylin and eosin staining, showing dense cutaneous infiltration by monocytic cells (C). By the start of the fourth treatment cycle, the infiltrate had largely cleared (D).

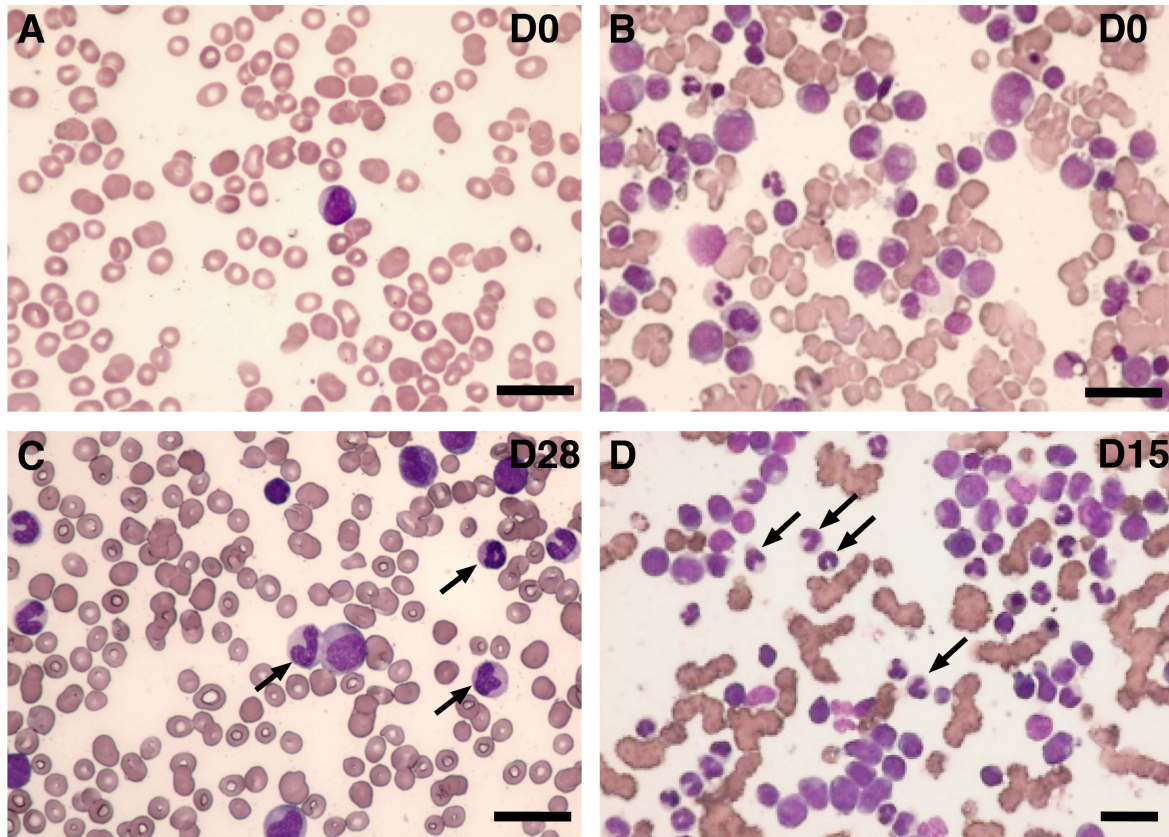

**Figure S3. Pinometostat-induced differentiation of leukemic blasts in *MLL-r* patients.**

Pleomorphic leukocytosis in PBMC samples before treatment (A) and at the end of cycle 1 following 28-day (D28) pinometostat CIV infusion (C). Leukemic blasts in a pretreatment bone marrow sample showing increased numbers of immature cells (B). After 15 days of pinometostat treatment, bone marrow samples show evidence of increased myeloid differentiation (D). Arrowheads in C and D show differentiated leukocytes following pinometostat treatment. All panels, hematoxylin and eosin staining. Scale Bar = 50  $\mu\text{m}$  for all.

## REFERENCES

1. Krivtsov AV, Armstrong SA. MLL translocations, histone modifications and leukemia stem-cell development. *Nat Rev Cancer*. 2007;7(11):823-833.
